# Supplementary material for: Solvent-induced diversity of luminescent metal–organic frameworks based on different secondary building units
Source: Royal Society of Chemistry journal article supplement (doi:10.1039/c7ra08188j), 2017-01-01
Supplement: c7ra08188j1.pdf [file c7ra08188j1.pdf]

*Electronic Supplementary Information*

**Solvent-induced diversity of luminescent metal-organic frameworks  
based on different secondary building units**

Lu Wang, Guo-Ping Yang,\* Yang-Tian Yan, Jing Jin, Yan Ning and Yao-Yu Wang

Key Laboratory of Synthetic and Natural Functional Molecule Chemistry of Ministry of Education,  
Shaanxi Key Laboratory of Physico-Inorganic Chemistry, College of Chemistry and Materials  
Science, Northwest University, Xi'an 710127, China.

**Table S1** Selected bond lengths (Å) and bond angles (°) for **1-3**.

| Complex1            |            |                     |            |
|---------------------|------------|---------------------|------------|
| Cd(1)-O(4)#1        | 2.423(4)   | Cd(1)-O(2)          | 2.248(4)   |
| Cd(1)-O(1)#2        | 2.287(5)   | Cd(1)-O(3)#1        | 2.436(4)   |
| Cd(1)-O(3)#3        | 2.283(4)   | Cd(1)-O(8)          | 2.310(5)   |
| Cd(2)-O(6)          | 2.261(5)   | Cd(2)-O(5)          | 2.332(6)   |
| O(4)#1-Cd(1)-O(3)#1 | 53.37(12)  | Cd(2)-O(7)          | 2.62(3)    |
| O(2)-Cd(1)-O(1)#2   | 105.7(2)   | Cd(2)-O(7A)         | 2.241(12)  |
| O(2)-Cd(1)-O(3)#3   | 104.53(16) | O(2)-Cd(1)-O(4)#1   | 167.28(17) |
| O(1)#2-Cd(1)-O(4)#1 | 83.0(2)    | O(2)-Cd(1)-O(3)#1   | 115.86(15) |
| O(1)#2-Cd(1)-O(8)   | 158.57(19) | O(2)-Cd(1)-O(8)     | 88.1(2)    |
| O(3)#3-Cd(1)-O(1)#2 | 74.63(16)  | O(1)#2-Cd(1)-O(3)#1 | 93.65(15)  |
| O(3)#3-Cd(1)-O(8)   | 86.20(17)  | O(3)#3-Cd(1)-O(4)#1 | 86.53(14)  |
| O(8)-Cd(1)-O(3)#1   | 94.88(17)  | O(3)#3-Cd(1)-O(3)#1 | 139.61(14) |
| O(5)-Cd(2)-O(7)#4   | 139.5(6)   | O(8)-Cd(1)-O(4)#1   | 86.4(2)    |
| O(6)#4-Cd(2)-O(5)   | 112.3(2)   | O(5)#4-Cd(2)-O(5)   | 93.7(3)    |
| O(6)#4-Cd(2)-O(6)   | 165.5(3)   | O(5)-Cd(2)-O(7)     | 79.2(5)    |
| O(6)#4-Cd(2)-O(7)   | 89.2(5)    | O(6)-Cd(2)-O(5)     | 56.5(2)    |
| O(7A)-Cd(2)-O(5)#4  | 156.6(4)   | O(6)-Cd(2)-O(7)     | 96.9(5)    |
| O(7A)-Cd(2)-O(6)    | 90.5(4)    | O(7)#4-Cd(2)-O(7)   | 130.4(12)  |
| O(7A)-Cd(2)-O(6)#4  | 100.2(4)   | O(7A)-Cd(2)-O(5)    | 95.1(6)    |
| O(7A)#4-Cd(2)-O(7A) | 85.3(14)   |                     |            |

Symmetrical codes: #1 1.5-x, 0.5+y, 2.5-z;#2 x, 2-y, 0.5+z;#3 1.5-x, 1.5-y, 3-z;#4 1-x, y, -0.5-z.

---

**Complex2**

---

|                     |           |                     |           |
|---------------------|-----------|---------------------|-----------|
| Cd(2)-O(2)          | 2.280(7)  | Cd(2)-O(7)#3        | 2.446(6)  |
| Cd(2)-O(3)#1        | 2.259(10) | Cd(2)-O(3)          | 2.259(10) |
| Cd(1)-O(1)          | 2.194(8)  | Cd(1)-O(7)#2        | 2.358(8)  |
| Cd(1)-O(4)#1        | 2.290(8)  | O(2)-Cd(2)-O(2)#1   | 92.9(4)   |
| O(2)-Cd(2)-O(7)#2   | 106.9(3)  | O(3)-Cd(2)-O(2)     | 86.2(3)   |
| O(2)-Cd(2)-O(7)#3   | 160.0(3)  | O(3)-Cd(2)-O(7)#3   | 89.3(3)   |
| O(2)-Cd(2)-C(11)#2  | 133.5(2)  | O(3)-Cd(2)-O(3)#1   | 178.2(4)  |
| O(7)#3-Cd(2)-O(7)#2 | 53.5(3)   | O(1)#4-Cd(1)-O(7)#5 | 80.6(4)   |
| O(3)#1-Cd(2)-O(2)   | 95.1(4)   | O(1)-Cd(1)-O(4)#1   | 87.5(4)   |
| O(3)-Cd(2)-O(7)#2   | 89.1(3)   | O(7)#2-Cd(1)-O(7)#5 | 180.0     |
| O(1)#4-Cd(1)-O(1)   | 180.0     | O(4)#6-Cd(1)-O(7)#2 | 89.8(3)   |
| O(1)-Cd(1)-O(7)#5   | 99.4(4)   | O(4)#1-Cd(1)-O(7)#2 | 90.2(3)   |
| O(1)-Cd(1)-O(4)#6   | 92.5(4)   | O(4)#6-Cd(1)-O(4)#1 | 180.0     |

Symmetrical codes: #1 2-x, y, 1.5-z; #2 2-x, 1-y, 2-z; #3 1.5-x, 0.5-y, 2-z; #4 0.5+x, 0.5-y, 0.5+z; #5 1-x, y, 1.5-z; #6 -0.5+x, -0.5+y, z; #7 1.5-x, -0.5+y, 1.5-z.

---

**Complex3**

---

|                   |          |                   |          |
|-------------------|----------|-------------------|----------|
| Cd(1)-O(1)        | 2.194(8) | Cd(1)-O(2)#1      | 2.262(6) |
| Cd(1)-O(3)#2      | 2.375(7) | Cd(1)-O(4)#2      | 2.273(7) |
| Cd(1)-O(5)#3      | 2.366(8) | Cd(1)-O(7)        | 2.381(7) |
| O(1)-Cd(1)-O(2)#1 | 127.0(3) | O(1)-Cd(1)-O(3)#2 | 147.8(3) |
| O(1)-Cd(1)-O(4)#2 | 94.0(3)  | O(1)-Cd(1)-O(5)#3 | 89.8(3)  |
| O(1)-Cd(1)-O(7)   | 85.9(3)  |                   |          |

Symmetrical codes: #1 -x, -y, -z; #2 -1-x, -y, 1-z; #3 -1+x, -1+y, z.

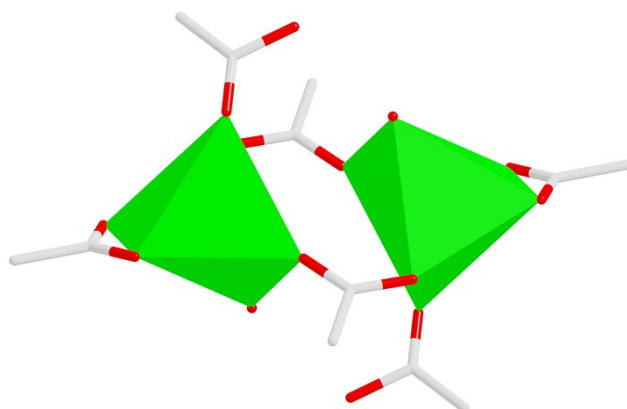

(a)

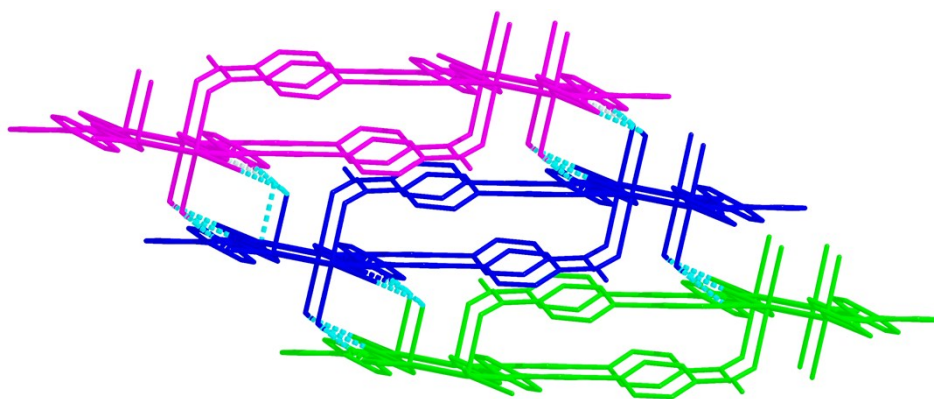

(b)

**Fig. S1** (a) The dimeric SBU in **3**. (b) The H-bonds [O7-H7B...O2 = 1.811 Å and O7-H7A...O3 = 2.667 Å] between the adjacent layers in **3**.

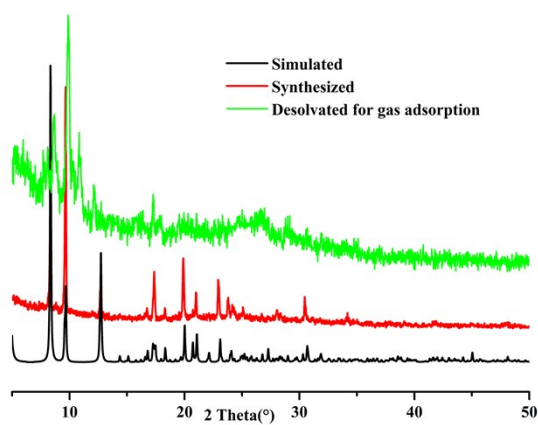

(a)

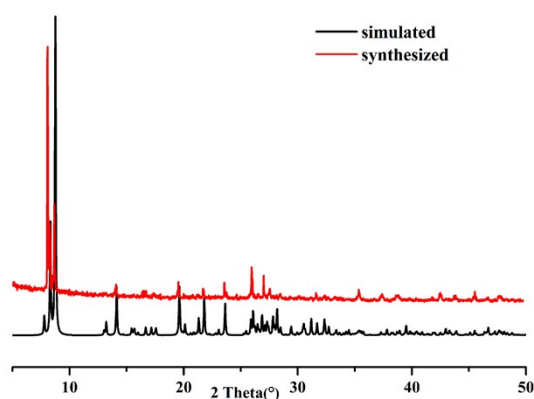

(b)

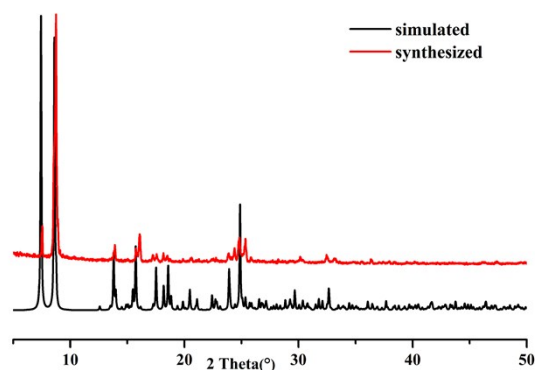

(c)

**Fig. S2** PXRD patterns of **1-3** in (a-c) simulated from the X-ray single-crystal structure, experimental samples and desolvated samples.

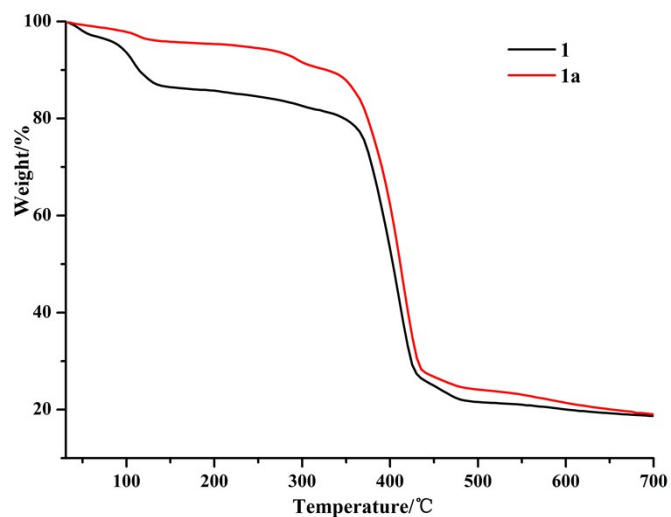

(a)

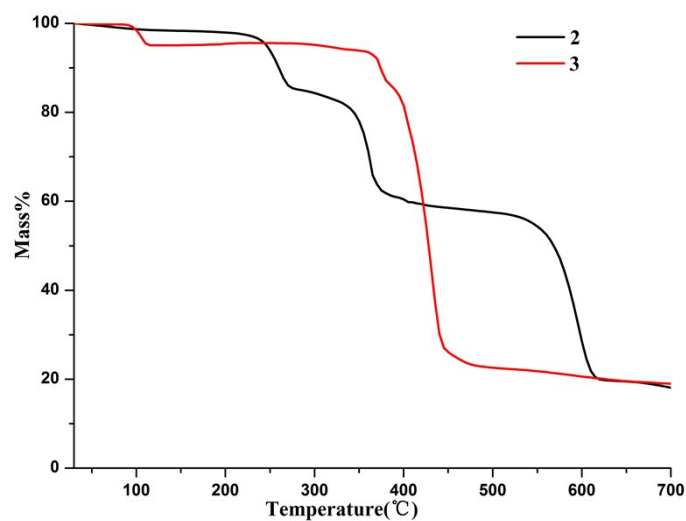

(b)

Fig. S3 TGA plots of complexes 1-3.

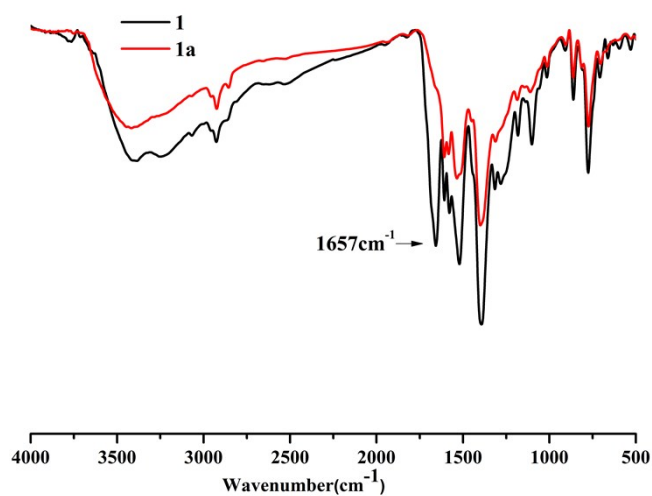

Fig. S4 IR spectra of the as-synthesized and desolvated **1** (**1a**). The characteristic C=O vibration at  $1657\text{ cm}^{-1}$  of DMF in **1** is absent in **1a**, indicating the complete removal of DMF.

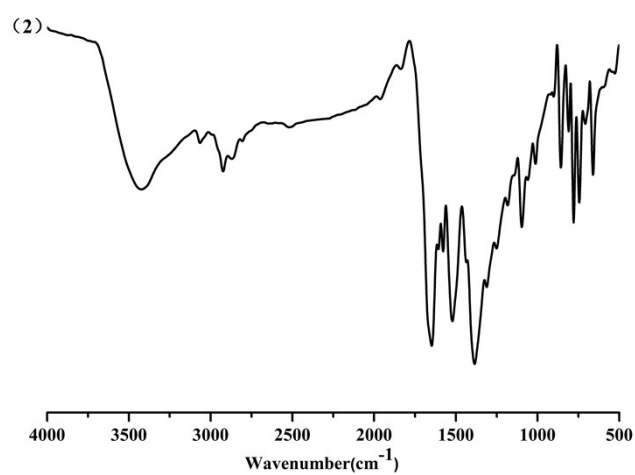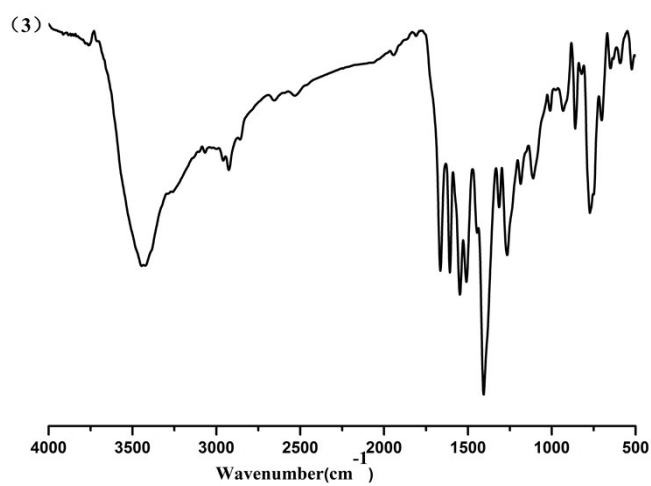

Fig. S5 IR spectra of the as-synthesized **2** and **3**.

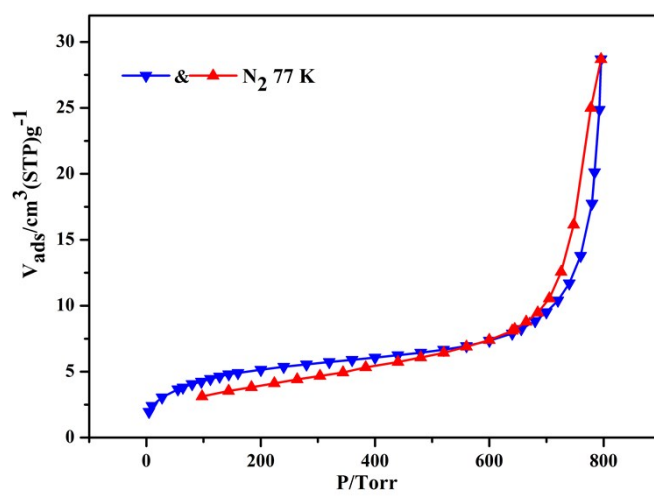

Fig. S6 The adsorption isotherms of **1a** ( $\text{N}_2$ ) at 77 K.

### IAST adsorption selectivity calculation:

The experimental isotherm data for pure CO<sub>2</sub> and CH<sub>4</sub> (measured at 273 and 298 K) were fitted using a Langmuir-Freundlich (L-F) model:

$$q = \frac{a * b * p^c}{1 + b * p^c}$$

Where  $q$  and  $p$  are adsorbed amounts and pressures of component  $i$ , respectively. The adsorption selectivities for binary mixtures of CO<sub>2</sub>/CH<sub>4</sub> at 273 and 298 K, defined by

$$S_{ads} = (q_1 / q_2) / (p_1 / p_2)$$

Where  $q_i$  is the amount of  $i$  adsorbed and  $p_i$  is the partial pressure of  $i$  in the mixture.

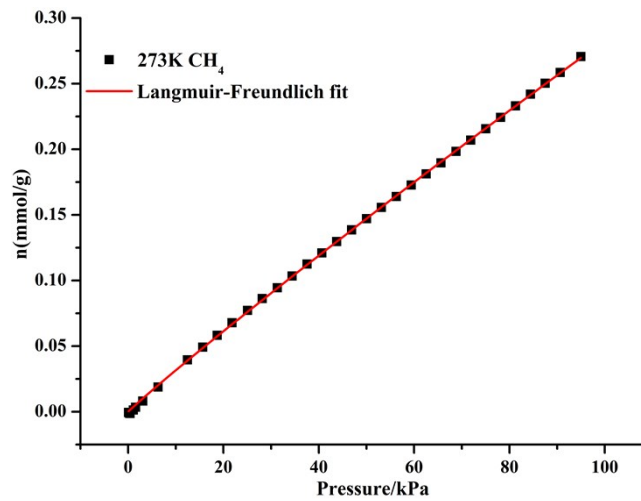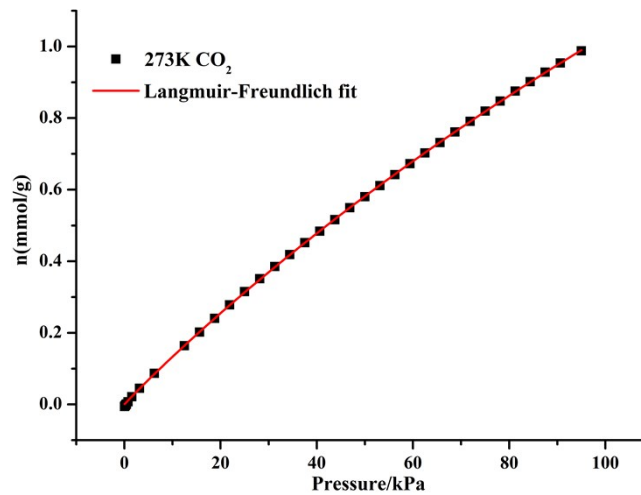

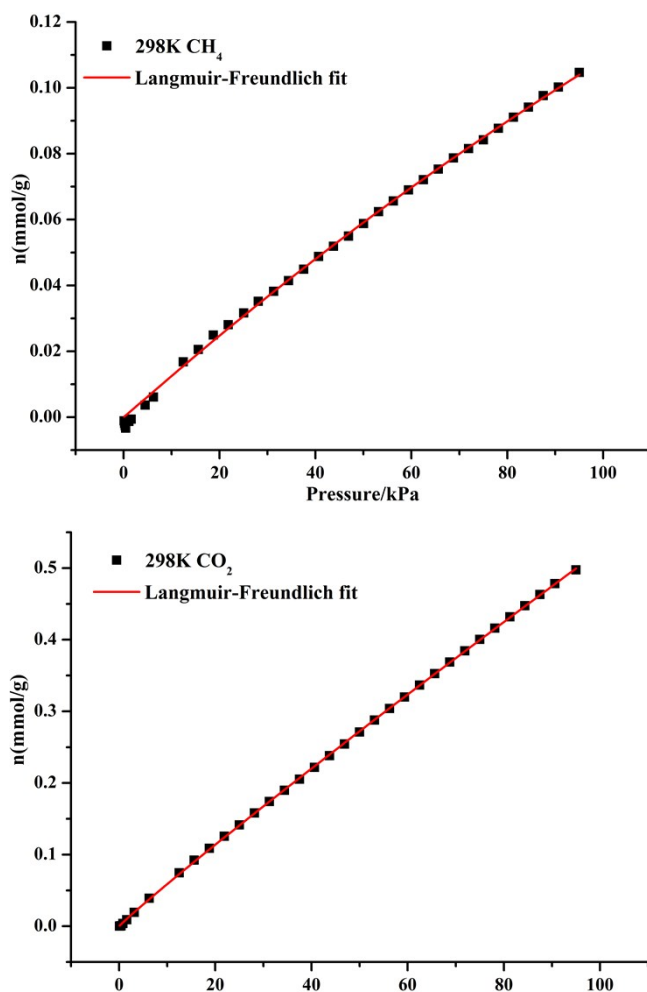

**Fig. S7** CO<sub>2</sub> adsorption isotherms of **1a** at 298K with fitting by L-F model:  $a = 36.29522$ ,  $b = 1.79197 \times 10^{-4}$ ,  $c = 0.95632$ ,  $\text{Chi}^2 = 1.69 \times 10^{-6}$ ,  $R^2 = 0.99994$ ; CO<sub>2</sub> adsorption isotherms of **1a** at 273K with fitting by L-F model:  $a = 5.16565$ ,  $b = 0.0028$ ,  $c = 0.97488$ ,  $\text{Chi}^2 = 7.91396 \times 10^{-6}$ ,  $R^2 = 0.99994$ ; CH<sub>4</sub> adsorption isotherms of **1a** at 298K with fitting by L-F model:  $a = 0.58455$ ,  $b = 0.00208$ ,  $c = 1.01934$ ,  $\text{Chi}^2 = 1.98953 \times 10^{-6}$ ,  $R^2 = 0.99838$ ; CH<sub>4</sub> adsorption isotherms of **1a** at 273K with fitting by L-F model:  $a = 10.39661$ ,  $b = 3.31485 \times 10^{-4}$ ,  $c = 0.96323$ ,  $\text{Chi}^2 = 1.37919 \times 10^{-6}$ ,  $R^2 = 0.99982$ .
